# Supplementary material for: Carbon-doping-induced energy-band modification and vacancies in SnS2 nanosheets for room-temperature ppb-level NO2 detection
Source: Royal Society of Chemistry journal article supplement (doi:10.1039/d1qi00930c), 2021-01-01
Supplement: d1qi00930c1.pdf [file d1qi00930c1.pdf]

## Supporting Information

### **Carbon-Doping Induced Energy Band Modification and Vacancy in SnS<sub>2</sub> Nanosheets for Room-temperature ppb-Level NO<sub>2</sub> Detection**

*Ruozhen Wu<sup>a</sup>, Juanyuan Hao<sup>\*a,b</sup>, Tingting Wang<sup>a</sup>, Shengliang Zheng<sup>a</sup> and You Wang*

*<sup>\*a,b</sup>*

<sup>a</sup>School of Materials Science and Engineering, Harbin Institute of Technology, Harbin 150001, P. R. China.

<sup>b</sup>Key Laboratory of Micro-Systems and Micro-Structures Manufacturing, Ministry of Education, Harbin 150001, P. R. China

\*E-mail: [jyhao@hit.edu.cn](mailto:jyhao@hit.edu.cn) and [y-wang@hit.edu.cn](mailto:y-wang@hit.edu.cn)

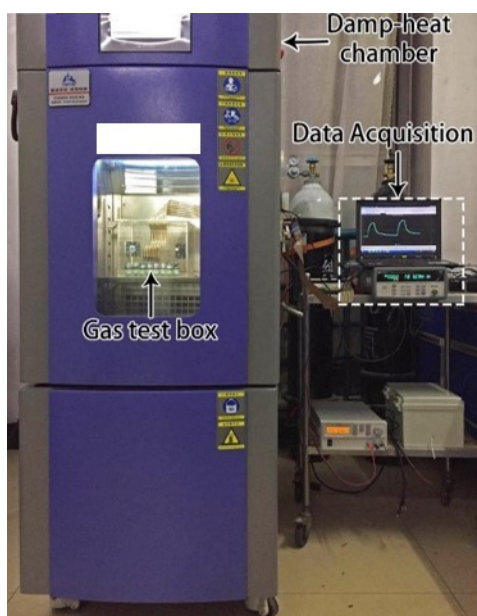

**Fig. S1** Homemade chemical gas sensing analysis system. The gas test box is placed in a cyclic damp heat test instrument (left) with the controllable temperature and relative humidity.

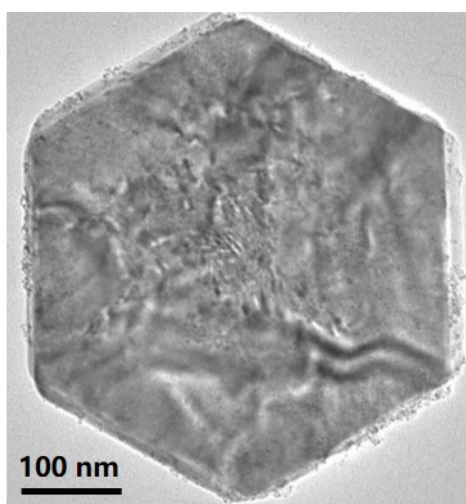

**Fig. S2** TEM image of pristine SnS<sub>2</sub>. The morphology of pristine SnS<sub>2</sub> showed hexagonal plate-like structure with uniform lateral size of ~400 nm.

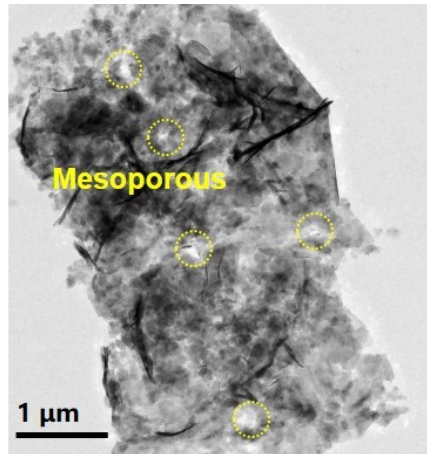

**Fig. S3** TEM image of the C-SnS<sub>2</sub>-32 sample. It indicates the obvious mesoporous nanostructures in the C-SnS<sub>2</sub>-32 nanosheets.

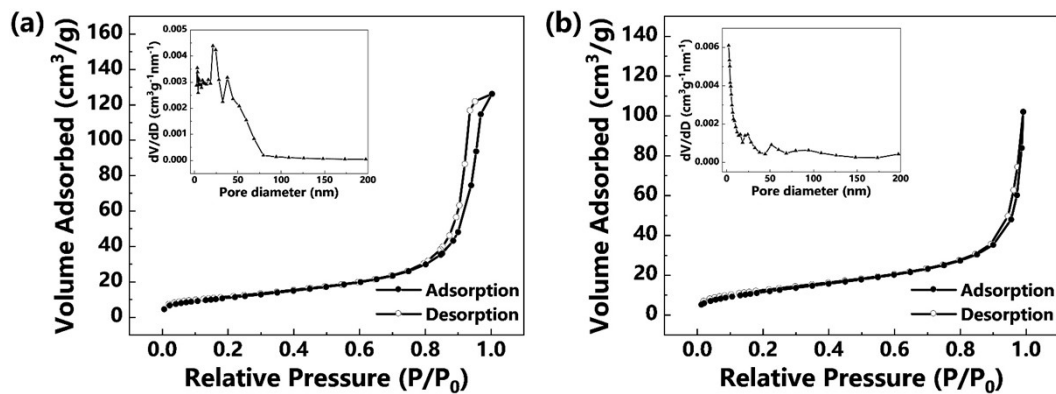

**Fig. S4** N<sub>2</sub> sorption isotherms at 77 K of (a) C-SnS<sub>2</sub>-32 and (b) pristine SnS<sub>2</sub>. The BET surface area of C-SnS<sub>2</sub>-32 nanosheets was measured to be 26.6 m<sup>2</sup>g<sup>-1</sup>, which was 2.5 times larger than that of pristine SnS<sub>2</sub> (10.7 m<sup>2</sup>g<sup>-1</sup>), which indicates that the adsorption capacity of NO<sub>2</sub> is improved on the C-doped SnS<sub>2</sub> surface.

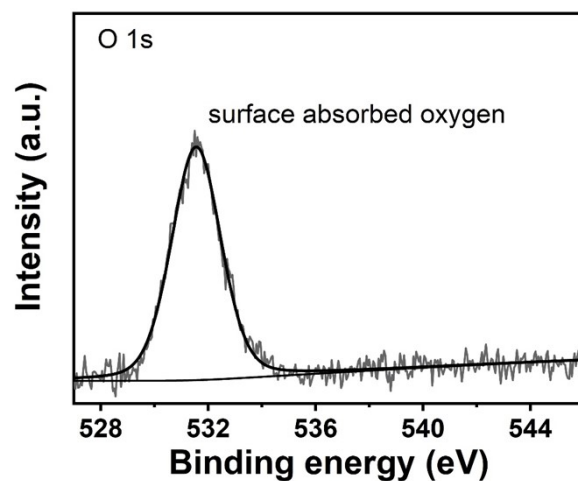

**Fig. S5** High-resolution O 1s XPS spectra for the C-SnS<sub>2</sub>-32. The peak centred at 531.9 eV is assigned to the surface adsorbed oxygen.<sup>[1,2]</sup>

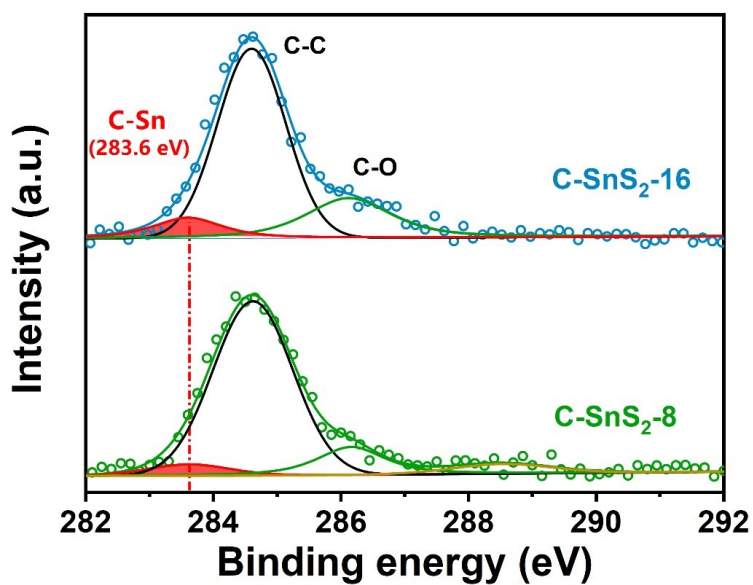

**Fig. S6** High-resolution C 1s XPS spectra for C-SnS<sub>2</sub>-8 and C-SnS<sub>2</sub>-16. The clear signal of C-Sn bond is also found in both of C-SnS<sub>2</sub>-8 and C-SnS<sub>2</sub>-16, confirming the presence

of C doping in SnS<sub>2</sub>.

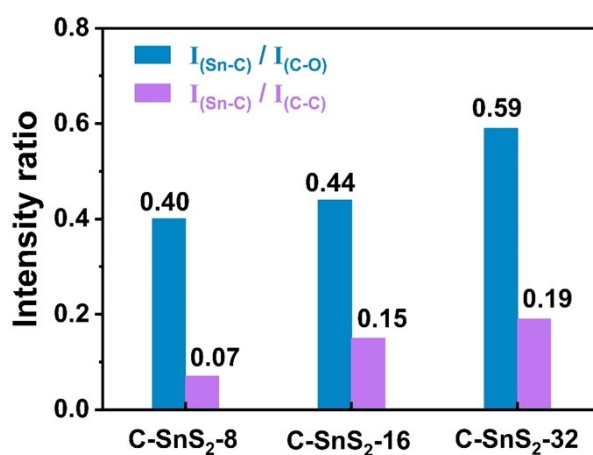

**Fig. S7** The peak intensity ratios of Sn-C with C-O and C-C for C-doped SnS<sub>2</sub>. The peak intensity ratios of the Sn-C/C-C and the Sn-C/C-O increase from C-SnS<sub>2</sub>-8 to C-SnS<sub>2</sub>-32, indicating the content of Sn-C bond increases with C dopants concentration while the C-C and C-O peaks does not change.

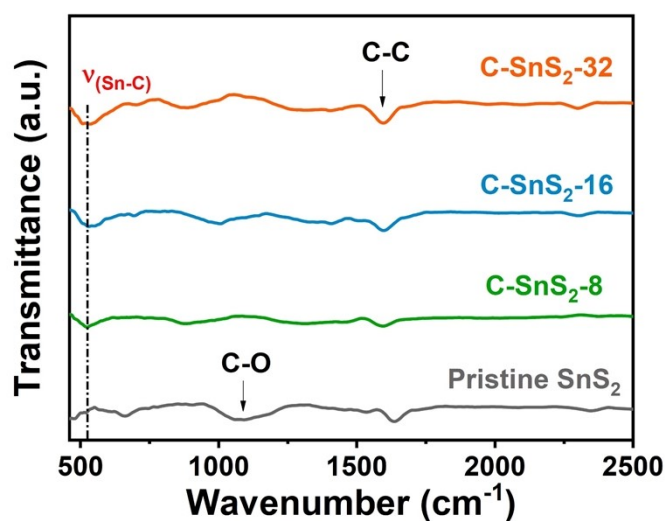

**Fig. S8** FT-IR spectra of pristine SnS<sub>2</sub>, C-SnS<sub>2</sub>-8, C-SnS<sub>2</sub>-16, and C-SnS<sub>2</sub>-32. The peak at ~520 cm<sup>-1</sup> for C-doped SnS<sub>2</sub> is assigned to the Sn-C stretching, which is absent in pristine SnS<sub>2</sub>, supporting that C is doping into SnS<sub>2</sub> crystals.

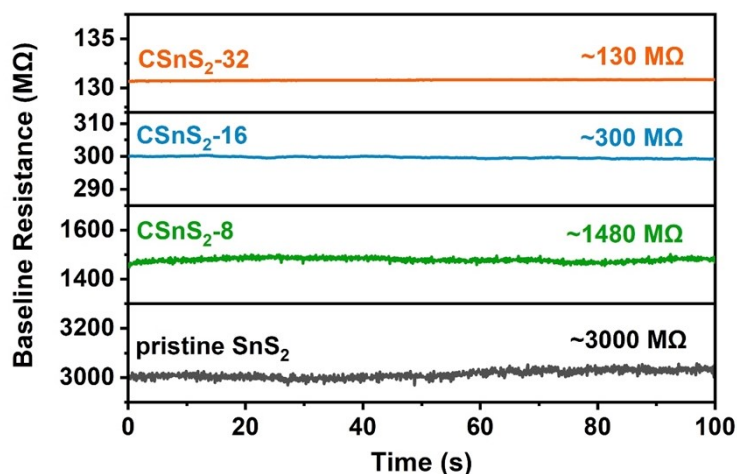

**Fig. S9** Baseline resistance of pristine SnS<sub>2</sub>, C-SnS<sub>2</sub>-8, C-SnS<sub>2</sub>-16, and C-SnS<sub>2</sub>-32. The baseline resistance sharply declined after C doping, from ~3000 MΩ of pristine SnS<sub>2</sub> to ~130 MΩ of C-SnS<sub>2</sub>-32, indicating that the C doping dramatically enhanced the electron concentration and the conductivity of SnS<sub>2</sub>.

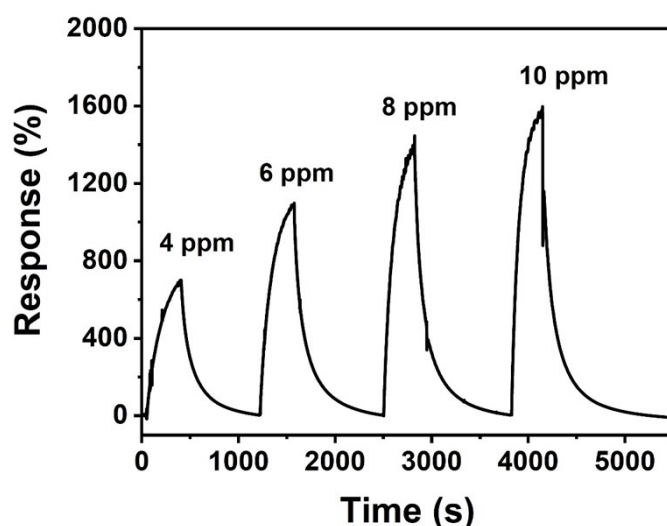

**Fig. S10** Dynamic response-recovery curve of C-SnS<sub>2</sub>-32 to diverse NO<sub>2</sub> concentrations from 4 ppm to 10 ppm. The result indicates that the response value of C-SnS<sub>2</sub>-32 sensor increases with increasing NO<sub>2</sub> concentration and the signal completely returns to initial state after NO<sub>2</sub> release.

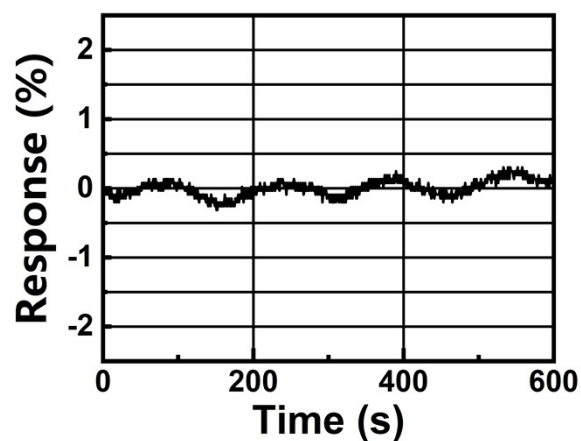

**Fig. S11** A temporal trace of experimentally recorded noise of response for the sample C-SnS<sub>2</sub>-32. The result indicates that the root-mean-square value of response noise is approximate ~0.12%.

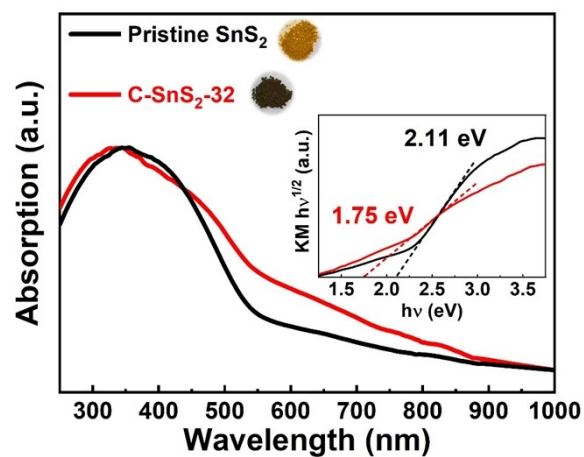

**Fig. S12** UV-Vis diffuse reflectance spectroscopy of the C-SnS<sub>2</sub>-32 and pristine SnS<sub>2</sub>. The inset is Tauc plot with indirect bandgap fitting. The characterization of UV-Vis diffuse reflectance spectroscopy indicates the conspicuously narrowed bandgap structure from 2.11 to 1.75 eV after C doping.

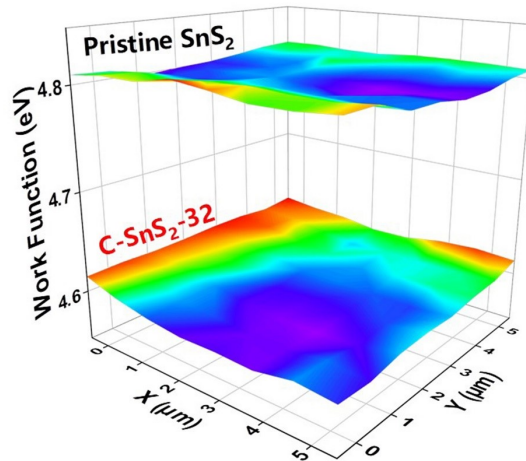

**Fig. S13** KPFM measured work function area scans of the C-SnS<sub>2</sub>-32 and pristine SnS<sub>2</sub>. The measurement of KPFM indicates the elevation of Fermi energy level from 4.81 to 4.61 eV after C doping.

## References

- [1] H. Chen, Y. Zhao, L. Shi, G.-D. Li, L. Sun and X. Zou, Revealing the relationship between energy level and gas sensing performance in heteroatom-doped semiconducting nanostructures, *ACS Appl. Mater. Interfaces*, 2018, **10**, 29795-29804.
- [2] Q. Yang, Y. Wang, J. Liu, J. Liu, Y. Gao, P. Sun, Z. Jie, T. Zhang, Y. Wang and G. Lu, Enhanced sensing response towards NO<sub>2</sub> based on ordered mesoporous Zr-doped In<sub>2</sub>O<sub>3</sub> with low operating temperature, *Sens. Actuators, B*, 2017, **241**, 806-813.
